# Supplementary material
Source: publisher figshare collection journal article supplement (https://sage.figshare.com/ndownloader/files/16798910)
Supplement: Supplementary file 1 [file 16798910]

## Supplementary material

### Materials and Methods

#### Biochemical assays

##### Estrogen (E2) assays

E2 was quantitatively estimated in mouse serum samples using enzyme-linked immunosorbent assay kits according to the method of *Jia et al. (2015)*<sup>1</sup> (catalog number: BYEK2129; Chongqing Biospes Company, Chongqing, China). The values were expressed as pmol/L.

#### Results

- **Restoration of Estrogen (E2) Serum levels by quercetin and rosuvastatin therapy**

CP group revealed a significant decrease in E2 level as compared to the normal control group. QH, QL, RH, RL and COM group revealed a significant increase in the E2 level as compared to the CP group. QH, QL, RH, and RL revealed a significant increase in the E2 level as compared to the COM group to reach near normal serum values (figure 1).

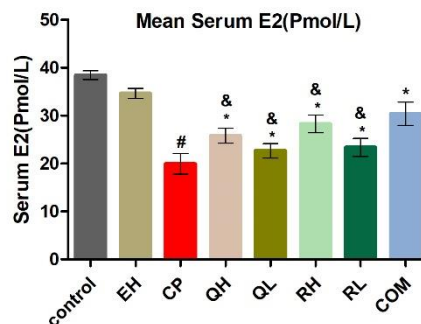

Estrogen (E2) level was assessed in different groups. Data were represented as mean  $\pm$  standard deviation (n=10). #—Significant ( $p < 0.05$ ) as compared with control group, \*—significant ( $p < 0.05$ ) as compared with CP group, &—significant ( $p < 0.05$ ) as compared with COM group.

1. Jia Y, Shi H and Fan D. Significance of gastrin-releasing peptide in ovarian cancer ES2 cells. *Oncology letters*. 2015; 10: 359-63.
